# Supplementary material for: Fargesin enhances the condition of intervertebral disc degeneration by suppressing BRD4 expression and influencing autophagy in NPCs
Source: Research Square preprint supplement (doi:10.21203/rs.3.rs-8530418/v1), 2026-01-16
Supplement: Supplementary file 1 [file 2cb4eefd8bf11b885e24232e.pdf]

Fig2A

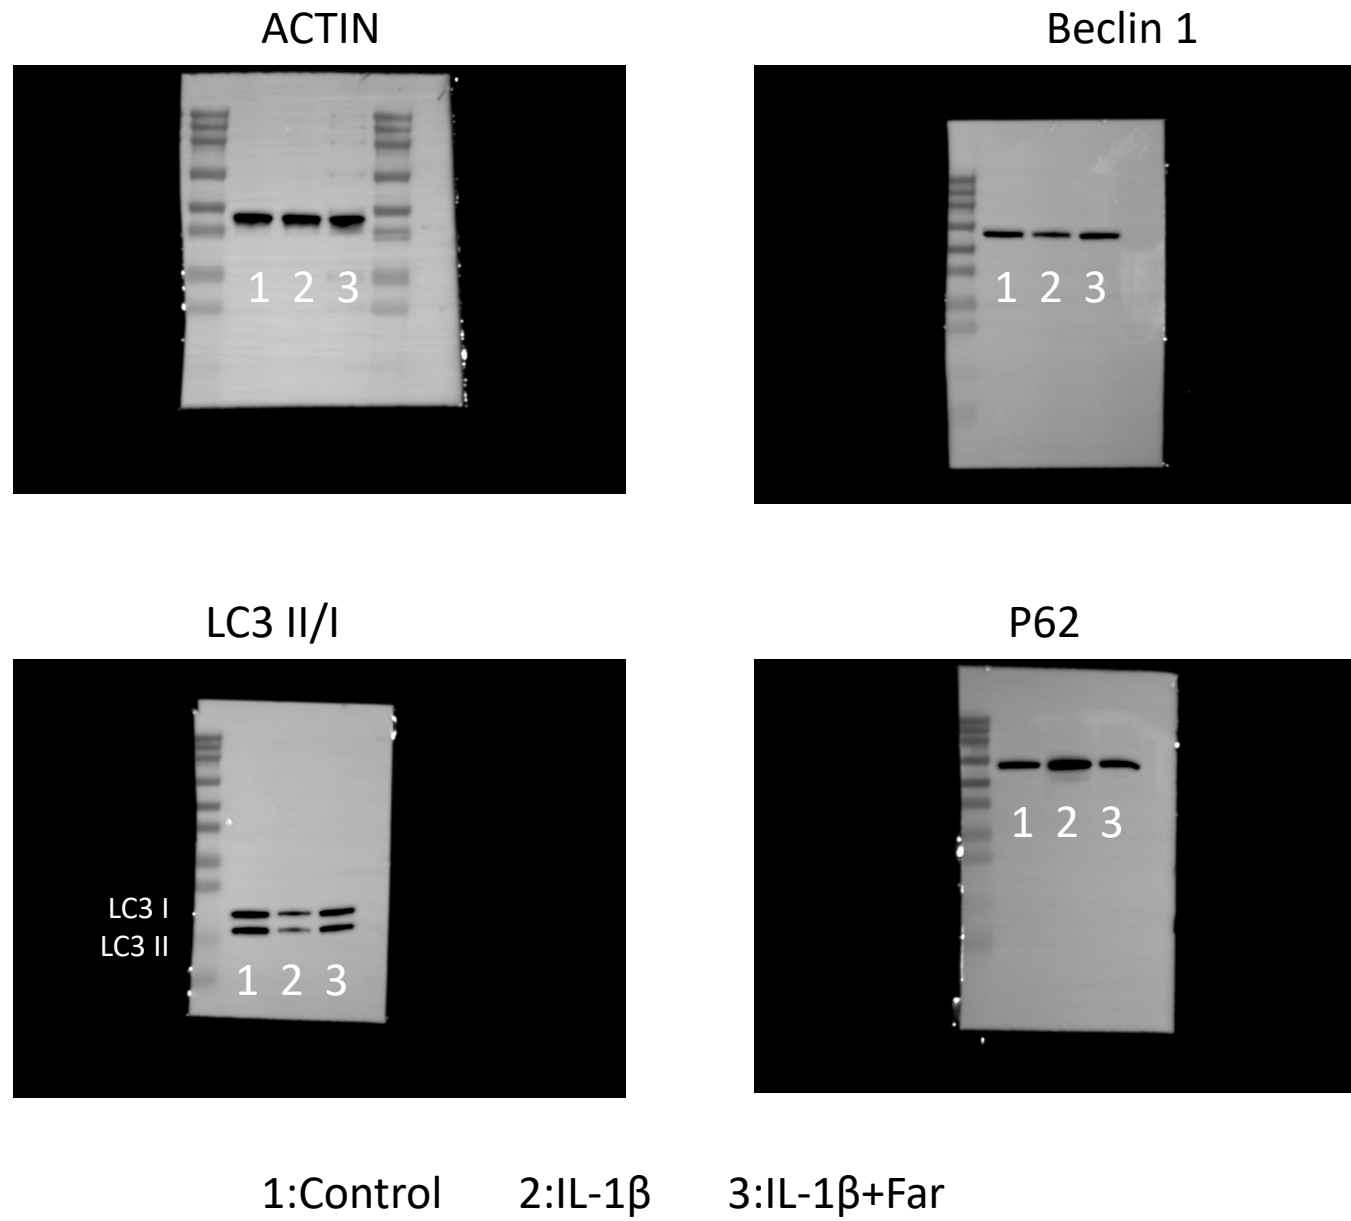

Fig2G

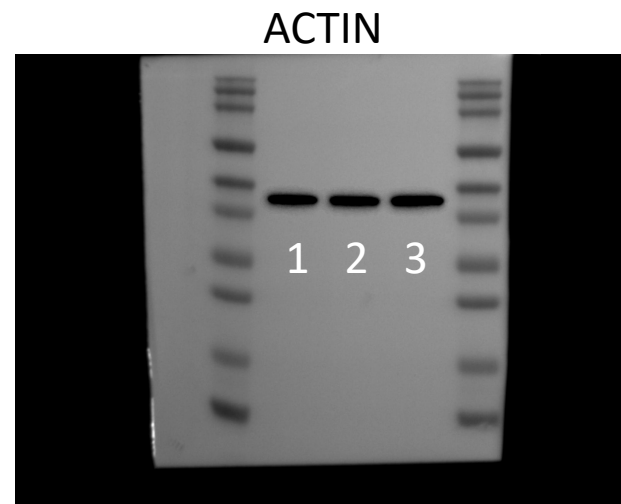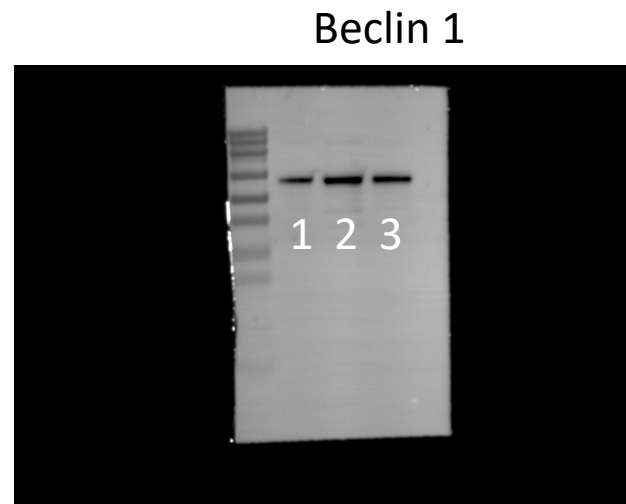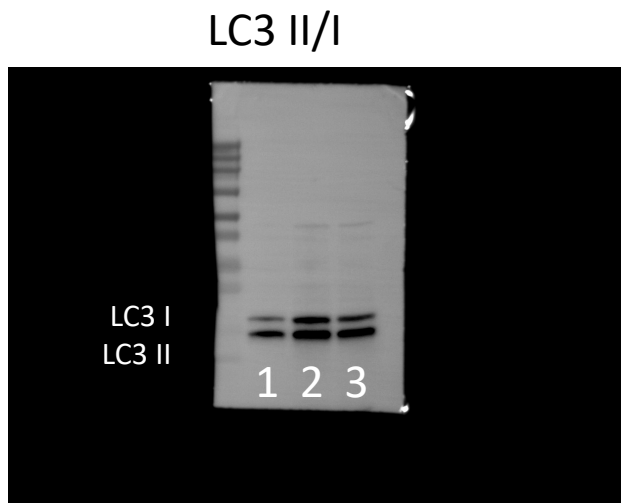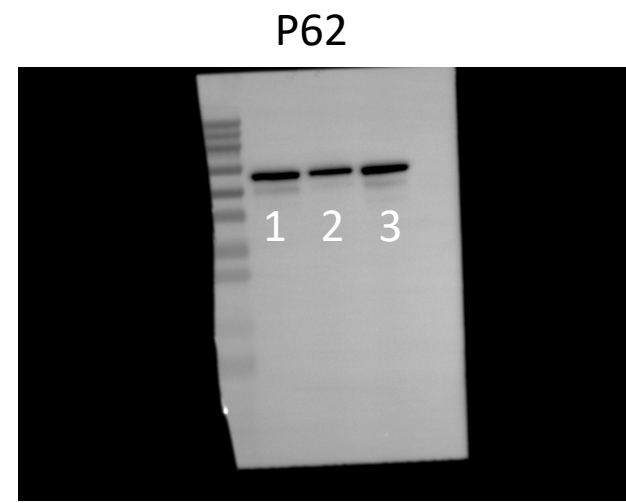

1:IL-1 $\beta$

2:IL-1 $\beta$ +Far

3:IL-1 $\beta$ +Far +3-MA

Fig3A

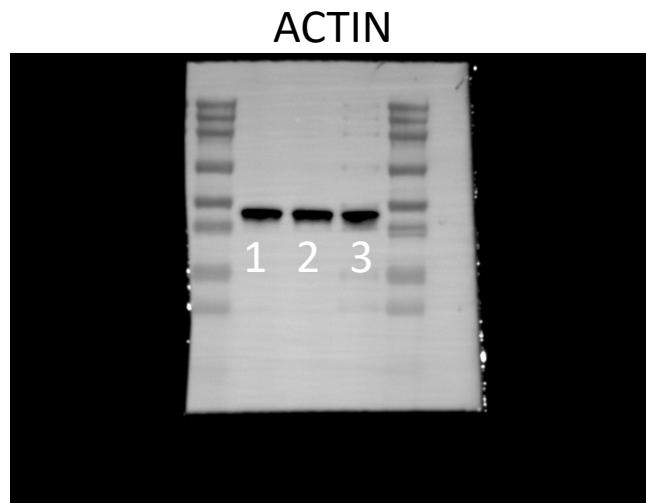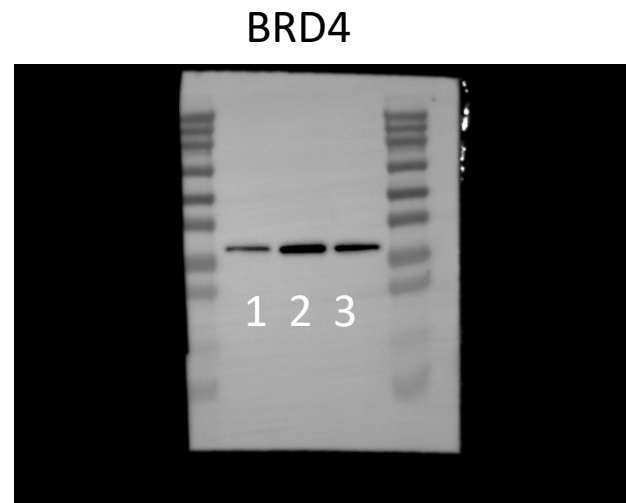

1:IL-1 $\beta$

2:IL-1 $\beta$ +Far

3:IL-1 $\beta$ +Far +3-MA

Fig3B

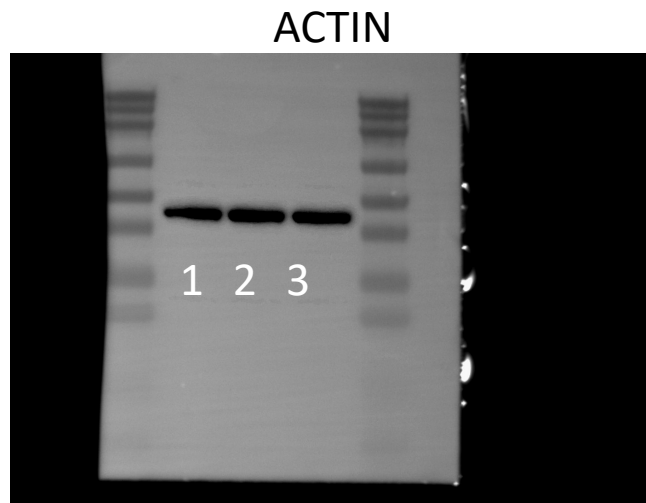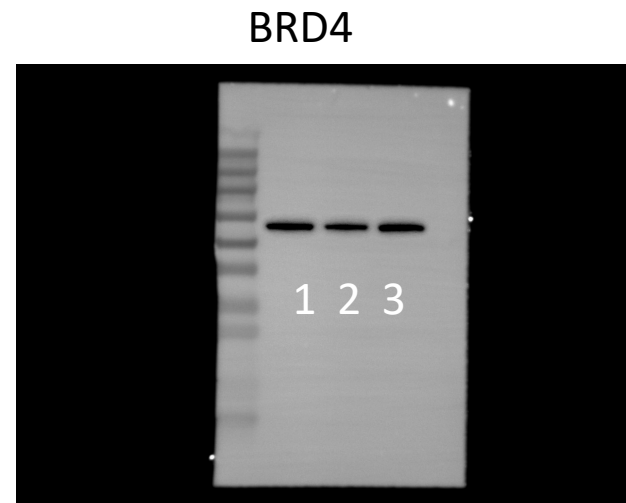

1:IL-1 $\beta$ +NC

2:IL-1 $\beta$ +Si-BRD4

3:IL-1 $\beta$

Fig3E

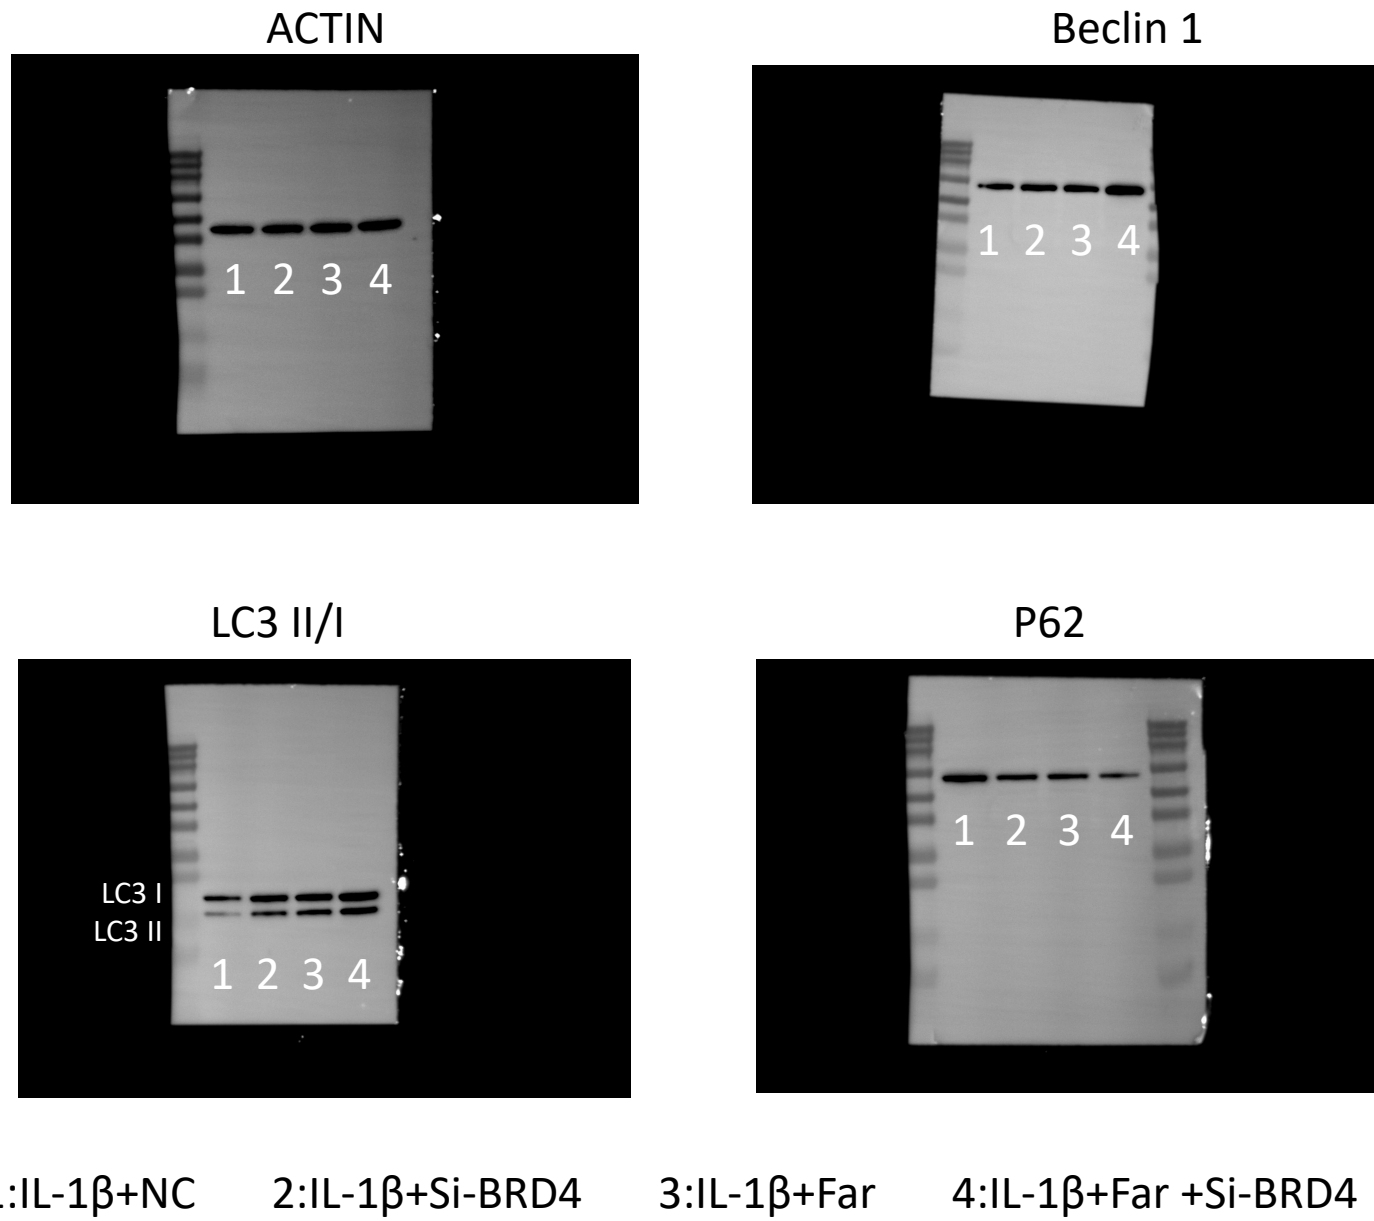

1:IL-1 $\beta$ +NC

2:IL-1 $\beta$ +Si-BRD4

3:IL-1 $\beta$ +Far

4:IL-1 $\beta$ +Far +Si-BRD4

Fig6A

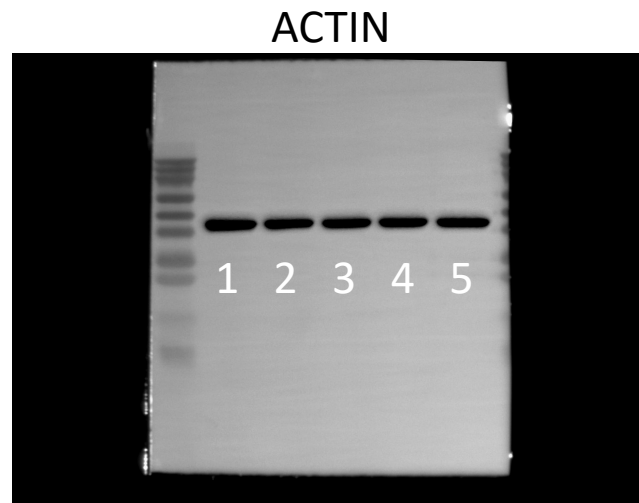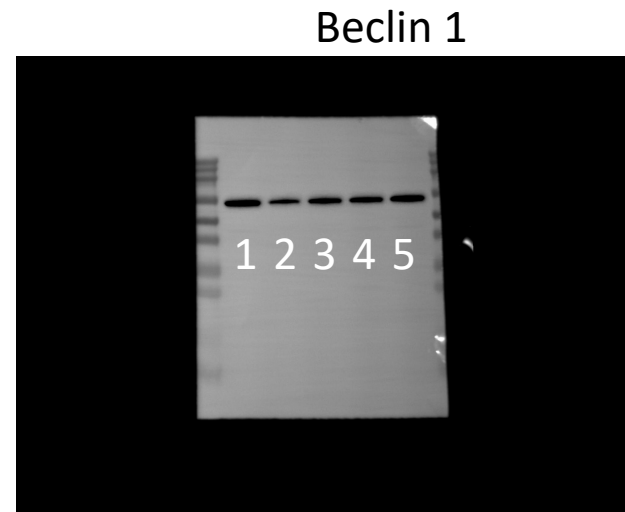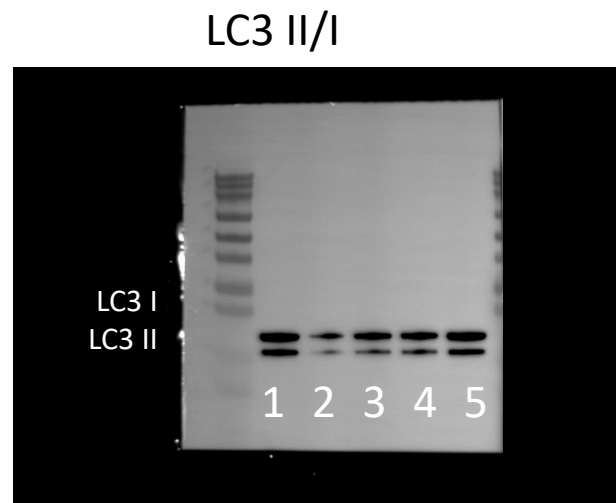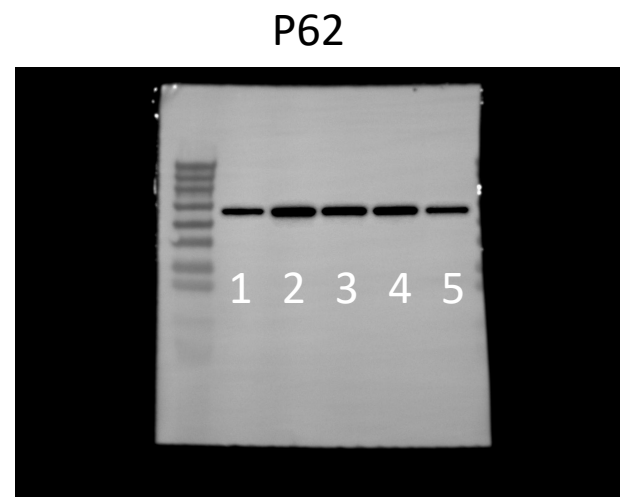

1:Sham

2:IVDD+Sh-NC

3:IVDD+Sh-BRD4

4:IVDD+Far

5:IVDD+Far +Sh-BRD4
